# Supplementary material for: Structural phase transformation of quantum spin liquid herbertsmithite via pressure induced enhancement of the cooperative Jahn–Teller effect and antisite disorder
Source: Royal Society of Chemistry journal article supplement (doi:10.1039/d3cp02562d), 2023-01-01
Supplement: d3cp02562d1.pdf [file d3cp02562d1.pdf]

**Supporting Information for**  
**Structural phase transformation of quantum spin liquid**  
**herbertsmithite via pressure induced enhancement of cooperative**  
**Jahn-Teller effect and antisite disorder**

Yaxiao Luo, Jian Zhang\*, Jiayi Wu, Hui Tian, Yanmei Ma, Lina Jiang, Hang Cui, and

Qiliang Cui

State Key Laboratory of Superhard Materials, College of Physics, Jilin University,

Changchun 130012, China

\*Corresponding author.

E-mail addresses: zhang\_jian@jlu.edu.cn.

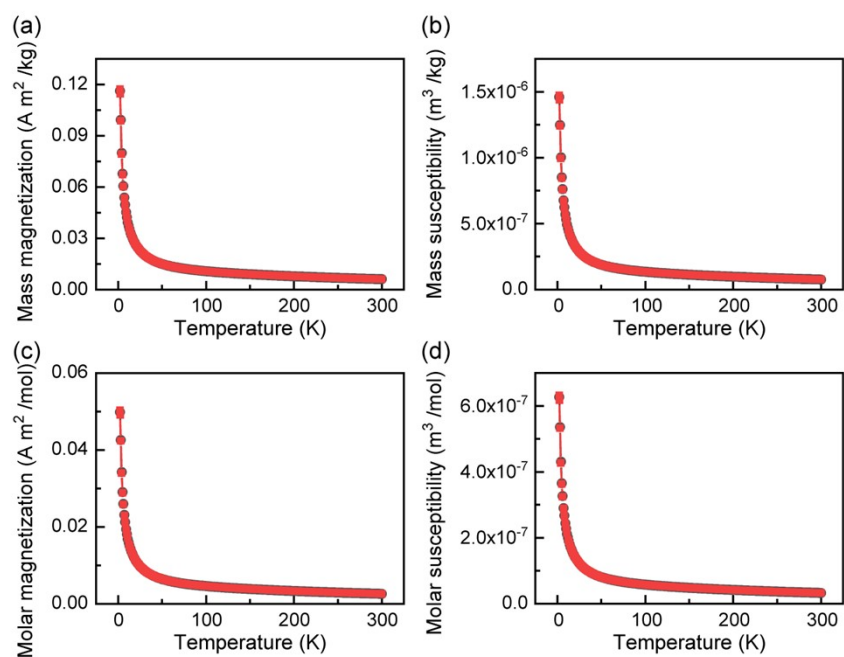

**Figure S1** Temperature dependence of (a) mass magnetization, (b) mass susceptibility, (c) molar magnetization, and (d) molar susceptibility measured at 1000 Oe under ZFC-FC conditions.

Note: The cgs units are used in most of the primary literature on magnetism. For example, a series of literature about the magnetic studies on herbertsmithite and its related compounds are still written using cgs units.<sup>1-5</sup> The data presented in SI units are shown in the Figure S1-S2.

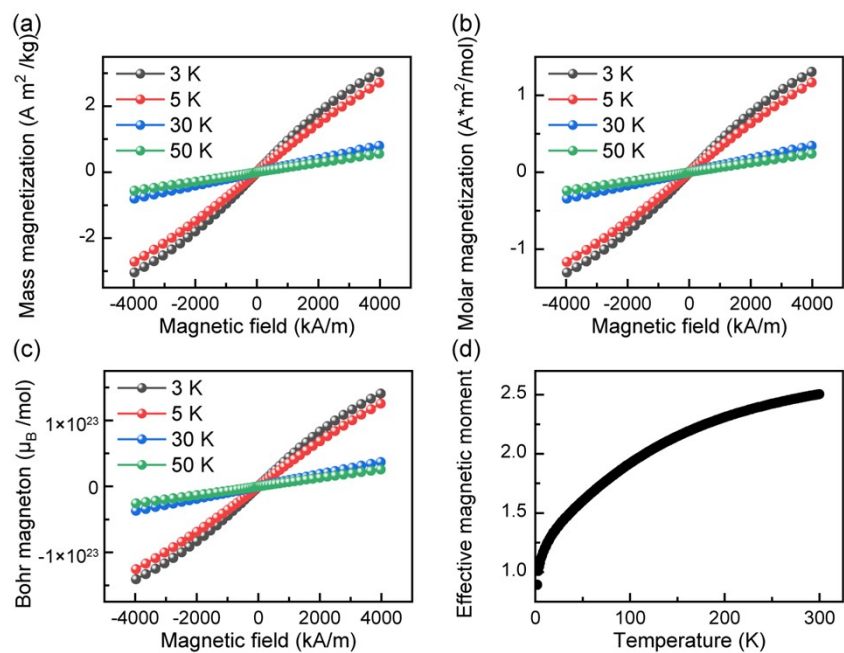

**Figure S2** (a-c) Magnetization against applied external field of duplicate sample for several temperatures. (d) The value of effective magnetic moment as a function of temperature.

Note: As shown in Figure S2 a-c, the M-H data were presented in mass magnetization, molar magnetization, and Bohr magneton/mol, respectively. The effective magnetic moment ( $\mu_{\text{eff}}$ ) is generally expressed in terms of the Bohr magneton. In fact, the values of  $\mu_{\text{eff}}$  depend on the definitions and the system of units. It is calculated from the molar susceptibility. The dimensionless nature of  $\mu_{\text{eff}}$  in the SI approach is demonstrated below using the equation<sup>6</sup>

$$\chi_M = \frac{N_A \mu_0 \mu_B^2 \mu_{\text{eff}}^2}{3k_B T}$$

where  $\chi_M$  is the molar susceptibility ( $\text{m}^3 \text{mol}^{-1}$ ),  $N_A$  is the Avogadro constant ( $N_A = 6.023 \times 10^{23}/\text{mol}$ ),  $\mu_0$  is the permeability of a vacuum ( $\mu_0 = 4\pi \times 10^{-7} \text{ kg m s}^{-2} \text{ A}^{-2}$ ),  $\mu_B$  the Bohr magneton ( $\mu_B = 9.274 \times 10^{-24} \text{ A m}^2$ ),  $k_B$  is the Boltzmann constant ( $k_B = 1.38 \times 10^{-23} \text{ J K}^{-1}$ ) and T is the thermodynamic temperature (K), respectively. The SI units of the physical quantities are given in parentheses.



## References

- 1 M. M. R. Bhuiyan, X. G. Zheng, M. Hagihala, S. Torii, T. Kamiyama and T. Kawae, *Phys. Rev. B*, 2020, **101**, 134424.
- 2 R. W. Smaha, W. He, J. M. Jiang, J. J. Wen, Y. F. Jiang, J. P. Sheckelton, C. J. Titus, S. G. Wang, Y. S. Chen, S. J. Teat, A. A. Aczel, Y. Zhao, G. Y. Xu, J. W. Lynn, H. C. Jiang and Y. S. Lee, *Npj Quantum Mater*, 2020, **5**, 23.
- 3 P. Malavi, S. Pal, D. V. S. Muthu, S. Sahoo, S. Karmakar and A. K. Sood, *Phys. Rev. B*, 2020, **101**, 214402.
- 4 K. Gupta, A. Dadwal, P. Ninawe, P. A. Joy and N. Ballav, *J Phys Chem C*, 2020, **124**, 19753-19759.
- 5 K. Tustain, E. E. McCabe, A. M. Arevalo-Lopez, A. S. Gibbs, S. P. Thompson, C. A. Murray, C. Ritter and L. Clark, *Chem. Mater.*, 2021, **33**, 9638-9651.
- 6 J. I. Hoppeé, *J. Chem. Educ.*, 1972, **49**, 505.
